# Supplementary material
Source: PubMed Central journal article supplement (PMC8117065)

## Supplemental Online Content

Chesney TR, Coburn N, Mahar AL, et al; Recovery After Surgical Therapy for Older Adults Research–Cancer (RESTORE-Cancer) Group. All-cause and cancer-specific death of older adults following surgery for cancer. *JAMA Surg*. Published online May 12, 2021. doi:10.1001/jamasurg.2021.1425

**eTable 1.** Data Sources

**eTable 2.** Cohort Identification Strategy

**eTable 3.** Covariate Definitions

**eTable 4.** Surgical Procedure Intensity

**eTable 5.** Characteristics of Study Cohort by Cancer Type

**eTable 6.** Cumulative Incidence at 1-year, 3-year, and 5-year Timepoints

**eFigure 1.** Cohort Selection Flowchart

**eFigure 2.** Cumulative Incidence of Cancer, Non-Cancer, and All-Cause Death by Cancer Type

**eFigure 3.** Cumulative Incidence of Cancer, Non-Cancer, and All-Cause Death Stratified by Gastrointestinal Cancer Subtypes

**eFigure 4.** Cumulative Incidence of Cancer, Non-Cancer, and All-Cause Death Stratified by Genitourinary Cancer Subtypes

This supplemental material has been provided by the authors to give readers additional information about their work.

**eTable 1. Data Sources**

| Database                                                                                                              | Description                                                                                                                                                                                                                                                                                                                                                                                                                                |
|-----------------------------------------------------------------------------------------------------------------------|--------------------------------------------------------------------------------------------------------------------------------------------------------------------------------------------------------------------------------------------------------------------------------------------------------------------------------------------------------------------------------------------------------------------------------------------|
| <b>Ontario Cancer Registry (OCR)</b>                                                                                  | The OCR is a passive, provincial registry all incident cancer diagnoses in Ontario. It includes 96% of cancer diagnoses in the province. Information included in the registry: cancer topography and morphology/histology, and details on diagnosis (e.g., types of contributing information to the diagnosis, dates).                                                                                                                     |
| <b>Activity Level Report (ALR) of Cancer Care Ontario</b>                                                             | Cancer Care Ontario maintains a database of cancers-specific services, including consultations, chemotherapy, and radiotherapy provided by regional cancer centers in the province. Because all radiotherapy is delivered at RCCs, it is a complete source of information. However, because not all cancer patients who receive surgery or chemotherapy visit an RCC, it cannot be used as a population data sources for those treatments. |
| <b>Registered Patient Database (RPDB)</b>                                                                             | The RPDB is an ICES database derived from all administrative data sources and provides demographic data including age, patient residence, vital status, date of last contact with the healthcare system, and OHIP eligibility.                                                                                                                                                                                                             |
| <b>Ontario Registrar General (ORG)</b>                                                                                | The ORG contains gold standard vital status data for all Ontarians. According to the Vital Statistics Act, it is mandatory to register all deaths occurring in the province.                                                                                                                                                                                                                                                               |
| <b>Ontario Marginalization Index (ONMarg)</b>                                                                         | The ON-MARG is a specialized database using Census data to profile relative area-level marginalization dependency, deprivation, ethnic concentration, and instability at various geographic levels in Ontario.                                                                                                                                                                                                                             |
| <b>Ontario Health Insurance Plan (OHIP)</b>                                                                           | The OHIP database contains all physician billing data including information on diagnoses as well as services provided, such as receipt of surgery, chemotherapy, and radiotherapy.                                                                                                                                                                                                                                                         |
| <b>Ontario Drug Benefit Database (ODB)</b>                                                                            | The ODB contains all information for prescription drug claims for individuals covered by the provincial plan (all individuals $\geq 65$ years old), including type of medication, dose, date of prescription filling, and duration of treatment.                                                                                                                                                                                           |
| <b>Canadian Institute of Health Information – Discharge Abstract Database and Same-Day Surgery (CIHI-DAD and SDS)</b> | CIHI-DAD and SDS are mandatory reporting systems that provide information on hospital admissions and same-day surgeries, including diagnoses, procedures, and length of stay.                                                                                                                                                                                                                                                              |

**eTable 2. Cohort Identification Strategy**

| Cancer site                                                                   | Sub-type                          | ICD.O-3 code                                                                                                                                                                                        |
|-------------------------------------------------------------------------------|-----------------------------------|-----------------------------------------------------------------------------------------------------------------------------------------------------------------------------------------------------|
| <b>Breast</b>                                                                 |                                   | C50.0 to 50.9                                                                                                                                                                                       |
| <b>Melanoma</b>                                                               |                                   | C44.2 to C 44.9                                                                                                                                                                                     |
| <b>Gastro-intestinal</b>                                                      | <b>Esophageal</b>                 | C15.0 to C15.9                                                                                                                                                                                      |
|                                                                               | <b>Gastric</b>                    | C16.0 to C16.9                                                                                                                                                                                      |
|                                                                               | <b>Hepato-pancreatico-biliary</b> | Liver C22.0, C22.1<br>Biliary C23.9, C24.0, C24.1, C24.8, C24.9<br>Pancreas C25.0 to C25.9                                                                                                          |
|                                                                               | <b>Colo-rectal and enteric</b>    | Small bowel C17.0 to C17.9<br>Colon C18.0 to C18.9<br>Rectum C19.9, C20.9                                                                                                                           |
| <b>Genito-urinary<br/>(excluding penis,<br/>seminal vesicle,<br/>urethra)</b> | <b>Kidney and ureter</b>          | C64.9, C65.9, C66.9                                                                                                                                                                                 |
|                                                                               | <b>Bladder</b>                    | C67.0 to C67.9                                                                                                                                                                                      |
|                                                                               | <b>Prostate</b>                   | C61.9                                                                                                                                                                                               |
|                                                                               | <b>Adrenal</b>                    | C74.0, C74.1, C74.9                                                                                                                                                                                 |
| <b>Gynecologic<br/>(excluding vulva)</b>                                      |                                   | Vagina C52.9<br>Cervix C53.0, C53.1, C53.8, C53.9<br>Uterus C54.0, C54.1, C54.2, C54.3, C54.8,<br>C54.9, C55.9<br>Ovaries C56.9, C57.0, C57.1, C57.2, C57.3,<br>C57.4<br>Others C57.7, C57.8, C57.9 |
| <b>Broncho-pulmonary</b>                                                      |                                   | C30.0 to 34.9, C38.1 to 39.9                                                                                                                                                                        |
| <b>Oro-pharyngeal</b>                                                         |                                   | C00.0 to C14.8, C76.0                                                                                                                                                                               |

**eTable 3. Covariate Definitions**

| Variable                                 | Definition                                                                                                                                                                                                                                                           | Source                                                                                                          | Type        | Analysis format                                                                                                |
|------------------------------------------|----------------------------------------------------------------------------------------------------------------------------------------------------------------------------------------------------------------------------------------------------------------------|-----------------------------------------------------------------------------------------------------------------|-------------|----------------------------------------------------------------------------------------------------------------|
| <b>Socio-demographic characteristics</b> |                                                                                                                                                                                                                                                                      |                                                                                                                 |             |                                                                                                                |
| <i>Age</i>                               | Age at diagnosis                                                                                                                                                                                                                                                     | Ontario Cancer Registry (OCR)                                                                                   | Categorical | 70-74<br>75-79<br>80-84<br>>85                                                                                 |
|                                          |                                                                                                                                                                                                                                                                      |                                                                                                                 | Continuous  | years                                                                                                          |
| <i>Sex</i>                               | Sex                                                                                                                                                                                                                                                                  | OCR                                                                                                             | Dichotomous | Male/Female                                                                                                    |
| <i>Material deprivation</i>              | Measure of the inability for individuals or households to afford goods or activities typical in a society at a given time [1]                                                                                                                                        | Canadian Census Registered person database (RPDB)<br>Ontario Marginalization index (ONMarg)                     | Categorical | 1 <sup>st</sup> (lowest)<br>2 <sup>nd</sup><br>3 <sup>rd</sup><br>4 <sup>th</sup><br>5 <sup>th</sup> (highest) |
| <i>Rural residence</i>                   | Determined with postal code of residence as per national census definition of a community <10,000 people [2]                                                                                                                                                         | RPDB                                                                                                            | Dichotomous | Urban/Rural                                                                                                    |
| <b>Clinical characteristics</b>          |                                                                                                                                                                                                                                                                      |                                                                                                                 |             |                                                                                                                |
| <i>Time period of diagnosis</i>          | Year of cancer diagnosis date                                                                                                                                                                                                                                        | OCR                                                                                                             | Categorical | 2007-2011<br>2012-2017                                                                                         |
| <i>Comorbidity burden</i>                | Measured using the Johns Hopkins Adjusted Clinical Groups system score based on health services use with a 24-month look-back window prior to the date of cancer diagnosis whereby the 32 aggregated diagnosis groups (ADG) are summed to create a total score [3,4] | CIHI-Discharge abstract database (DAD)<br>CIHI – Same day surgery (SDS)<br>Ontario Health Insurance Plan (OHIP) | Dichotomous | <10<br>≥10                                                                                                     |
| <i>Frailty score</i>                     | Measured using the Johns Hopkins Aggregates Clinical Diagnoses frailty marker [5]                                                                                                                                                                                    | CIHI-DAD<br>CIHI-SDS<br>NACRS                                                                                   | Dichotomous | Frailty<br>No frailty                                                                                          |
| <i>Cancer type</i>                       | Type of primary cancer based on ICD-O.3 codes (Supplemental Table 2)                                                                                                                                                                                                 | OCR                                                                                                             | Categorical | Breast<br>Skin<br>Gastrointestinal<br>Genitourinary<br>Gynecologic<br>Broncho-pulmonary<br>Oropharyngeal       |
| <b>Therapy characteristics</b>           |                                                                                                                                                                                                                                                                      |                                                                                                                 |             |                                                                                                                |
| <i>Procedure intensity</i>               | Intensity of the surgical procedure in terms of baseline risk, using a consensus validated definition [6]                                                                                                                                                            | CIHI-DAD<br>CIHI-SDS                                                                                            | Dichotomous | Low<br>High                                                                                                    |
| <i>Perioperative cancer therapy</i>      | Receipt of chemotherapy and/or radiation therapy ≤180 days prior to surgery to ≤180 days after surgery [7]                                                                                                                                                           | OHIP<br>ALR                                                                                                     | Dichotomous | Yes<br>No                                                                                                      |

1. Matheson FI, Dunn JR, Smith KL, Moineddin R, Glazier RH. Development of the Canadian Marginalization Index: a new tool for the study of inequality. *Canadian journal of public health*. 2012;103:S12-6.
2. Du Plessis V, Beshiri R, Bollman R. Definitions of "rural". *Rural Small Town Canada Anal Bull*. 2013;3:1-43
3. Reid RJ, Roos NP, MacWilliam L, Frohlich N, Black C. Assessing population health care need using a claims-based ACG morbidity measure: a validation analysis in the Province of Manitoba. *Health Serv Res. Health Research & Educational Trust*; 2002 Oct;37(5):1345-64.
4. Reid RJ, MacWilliam L, Verhulst L, Roos N, Atkinson M. Performance of the ACG case-mix system in two Canadian provinces. *Med Care*. 2001 Jan;39(1):86-99.
5. Sternberg SA, Wershof Schwartz A, Karunanathan S, Bergman H, Mark Clarfield A. The identification of frailty: a systematic literature review. *J Am Geriatr Soc*. 2011;59(11):2129-2138.
6. Schwarze ML, Barnato AE, Rathouz PJ, et al. Development of a list of high-risk operations for patients 65 years and older. *JAMA Surg*. 2015;150(4):325-331.
7. Booth CM, Nanji S, Wei X, et al. Use and effectiveness of adjuvant chemotherapy for stage III colon cancer: a population-based study. *J Natl Compr Cancer Netw*. 2016;14(1):47-56.

**eTable 4. Surgical Procedure Intensity**

| Low intensity                                                |                                                                                                                                                                                                                                                                                      | High intensity                       |                                                                                                                                                                                        |
|--------------------------------------------------------------|--------------------------------------------------------------------------------------------------------------------------------------------------------------------------------------------------------------------------------------------------------------------------------------|--------------------------------------|----------------------------------------------------------------------------------------------------------------------------------------------------------------------------------------|
| Partial and total mastectomy, with or without reconstruction | 1YM87 <sup>^^</sup> , 1YM88 <sup>^^</sup> , ,<br>1YM89 <sup>^^</sup> ,<br>1YM90 <sup>^^</sup> ,1YM91 <sup>^^</sup> ,<br>1YM92 <sup>^^</sup>                                                                                                                                          | Lobectomy and pneumonectomy          | 1GR.87 <sup>^^</sup> , 1GR89 <sup>^^</sup> ,<br>1GR91 <sup>^^</sup> , 1GT87 <sup>^^</sup> ,<br>1GT89 <sup>^^</sup> , 1GT91 <sup>^^</sup>                                               |
| Skin resection                                               | 1YF87 <sup>^^</sup> , 1YG87 <sup>^^</sup> ,<br>1YS87 <sup>^^</sup> , 1YR87 <sup>^^</sup> ,<br>1YT87 <sup>^^</sup> , 1YU87 <sup>^^</sup> ,<br>1YV87 <sup>^^</sup> , 1YW87 <sup>^^</sup> ,<br>1YZ87 <sup>^^</sup>                                                                      | Major larynx – complete laryngectomy |                                                                                                                                                                                        |
| Adrenalectomy                                                | 1PB87 <sup>^^</sup> , 1PB89 <sup>^^</sup><br>laparoscopy                                                                                                                                                                                                                             | Gastrectomy                          | 1NF87 <sup>^^</sup> , 1NF89 <sup>^^</sup> ,<br>1NF90 <sup>^^</sup> , 1NF91 <sup>^^</sup> ,<br>1NF92 <sup>^^</sup>                                                                      |
| Gynecology                                                   | 1RB87 <sup>^^</sup> , 1RB89 <sup>^^</sup> ,<br>1RF87 <sup>^^</sup> , 1RF89 <sup>^^</sup> ,<br>1RM87 <sup>^^</sup> , 1RM89 <sup>^^</sup> ,<br>1RM91 <sup>^^</sup> , 1RN87 <sup>^^</sup> ,<br>1RN89 <sup>^^</sup> , 1RN91 <sup>^^</sup> ,<br>1RS87 <sup>^^</sup> , 1RS89 <sup>^^</sup> | Colectomy and enterectomy            | 1NK87 <sup>^^</sup> , 1NM87 <sup>^^</sup> ,<br>1NM89 <sup>^^</sup> , 1NM91 <sup>^^</sup> ,<br>1NQ87 <sup>^^</sup> , 1NQ89 <sup>^^</sup>                                                |
|                                                              |                                                                                                                                                                                                                                                                                      | Esophagectomy                        | 1NA87 <sup>^^</sup> , 1NA88 <sup>^^</sup> ,<br>1NA89 <sup>^^</sup> , 1NA90 <sup>^^</sup> ,<br>1NA91 <sup>^^</sup> , 1NA92 <sup>^^</sup>                                                |
|                                                              |                                                                                                                                                                                                                                                                                      | Hepatectomy<br>Pancreatectomy        | 1OA87 <sup>^^</sup> , 1OE87 <sup>^^</sup> ,<br>1OE89 <sup>^^</sup> , 1OJ87 <sup>^^</sup> ,<br>1OJ89 <sup>^^</sup> , 1OK87 <sup>^^</sup> ,<br>1OK89 <sup>^^</sup> , 1OK91 <sup>^^</sup> |
|                                                              |                                                                                                                                                                                                                                                                                      | Adrenalectomy                        | 1PB87 <sup>^^</sup> , 1PB89 <sup>^^</sup><br>laparotomy                                                                                                                                |
|                                                              |                                                                                                                                                                                                                                                                                      | Nephroureterectomy                   | 1PC87 <sup>^^</sup> , 1PC89 <sup>^^</sup> ,<br>1PC91 <sup>^^</sup> , 1PE87 <sup>^^</sup> ,<br>1PE89 <sup>^^</sup> , 1PE91 <sup>^^</sup> ,<br>1PG87 <sup>^^</sup> , 1PG89 <sup>^^</sup> |
|                                                              |                                                                                                                                                                                                                                                                                      | Radical cystectomy                   | 1PL87 <sup>^^</sup> , 1PM87 <sup>^^</sup> ,<br>1PM89 <sup>^^</sup> , 1PM90 <sup>^^</sup> ,<br>1PM91 <sup>^^</sup> , 1PM92 <sup>^^</sup> ,                                              |
|                                                              |                                                                                                                                                                                                                                                                                      | Prostatectomy                        | 1QT87 <sup>^^</sup> , 1QT91 <sup>^^</sup>                                                                                                                                              |
|                                                              |                                                                                                                                                                                                                                                                                      | Pelvic evisceration                  | Included in other categories                                                                                                                                                           |

Schwarze ML, Barnato AE, Rathouz PJ, et al. Development of a list of high-risk operations for patients 65 years and older. *JAMA Surg.* 2015;150(4):325-331.

eTable 5. Characteristics of Study Cohort by Cancer Type

| Characteristic                |                           | Breast<br>(n=22,811) | Bronchopulmonary<br>(n=7429) | Gastrointestinal<br>(n=32,036) | Genitourinary<br>(n=8483) | Gynecologic<br>(n=6658) | Oropharyngeal<br>(867) | Melanoma<br>(n=3758) |
|-------------------------------|---------------------------|----------------------|------------------------------|--------------------------------|---------------------------|-------------------------|------------------------|----------------------|
| Age (years), median (IQR)     |                           | 76 (73-81)           | 75 (72-79)                   | 78 (74-83)                     | 74 (71-78)                | 75 (72-80)              | 77 (73-82)             | 78 (73-83)           |
| Age category<br>(years)       | 70-74                     | 8,994<br>(39.4%)     | 3,271<br>(44.0%)             | 9,837<br>(30.7%)               | 4,666<br>(55.0%)          | 2,883<br>(43.3%)        | 293 (33.8%)            | 1,166<br>(31.1%)     |
|                               | 75-79                     | 6,196<br>(27.2%)     | 2,581<br>(34.7%)             | 9,215<br>(28.8%)               | 2,125<br>(25.1%)          | 1,988<br>(29.9%)        | 249 (28.7%)            | 1,085<br>(28.9%)     |
|                               | 80-84                     | 4,466<br>(19.6%)     | 1,260<br>(17.0%)             | 7,599<br>(23.7%)               | 1,214<br>(14.3%)          | 1,133<br>(17.0%)        | 194 (22.4%)            | 842 (22.4%)          |
|                               | ≥85                       | 3,155<br>(13.8%)     | 317 (4.3%)                   | 5,385<br>(16.8%)               | 478 (5.6%)                | 654 (9.8%)              | 131 (15.1%)            | 660 (17.6%)          |
| Sex                           | Female                    | 22,530<br>(98.8%)    | 3,706<br>(49.9%)             | 15,273<br>(47.7%)              | 2,037<br>(24.0%)          | 6,656<br>(100.0%)       | 388 (44.8%)            | 1,529<br>(40.7%)     |
|                               | Male                      | 281 (1.2%)           | 3,723<br>(50.1%)             | 16,763<br>(52.3%)              | 6,446<br>(76.0%)          | --                      | 479 (55.2%)            | 2,224<br>(59.3%)     |
| Residence                     | Rural                     | 2,079 (9.1%)         | 837 (11.3%)                  | 3,489<br>(10.9%)               | 895 (10.6%)               | 553 (8.3%)              | ≤5 (0.3%)              | 3,282<br>(87.5%)     |
|                               | Urban                     | 20,577<br>(90.2%)    | 6,530<br>(87.9%)             | 28,275<br>(88.3%)              | 7,510<br>(88.5%)          | 6,075<br>(91.2%)        | 88 (10.1%)             | 439 (11.7%)          |
|                               | Missing                   | 155 (0.7%)           | 62 (0.8%)                    | 272 (0.8%)                     | 78 (0.9%)                 | 30 (0.5%)               | 776 (89.5%)            | 32 (0.9%)            |
| Comorbidity burden            | High (ADG≥10)             | 6,571<br>(28.8%)     | 3,035<br>(40.9%)             | 21,460<br>(67.0%)              | 2,856<br>(33.7%)          | 2,060<br>(30.9%)        | 291 (33.6%)            | 1,174<br>(31.3%)     |
|                               | Low (ADG<10)              | 16,240<br>(71.2%)    | 4,394<br>(59.1%)             | 10,576<br>(33.0%)              | 5,627<br>(66.3%)          | 4,598<br>(69.1%)        | 576 (66.4%)            | 2,579<br>(68.7%)     |
| Material deprivation quintile | 1 <sup>st</sup> (highest) | 4,227<br>(18.5%)     | 1,439<br>(19.4%)             | 6,028<br>(18.8%)               | 1,248<br>(14.7%)          | 1,153<br>(17.3%)        | 165 (19.0%)            | 524 (14.0%)          |
|                               | 2 <sup>nd</sup>           | 4,552<br>(20.0%)     | 1,622<br>(21.8%)             | 6,676<br>(20.8%)               | 1,557<br>(18.4%)          | 1,329<br>(20.0%)        | 173 (20.0%)            | 721 (19.2%)          |
|                               | 3 <sup>rd</sup>           | 4,415<br>(19.4%)     | 1,496<br>(20.1%)             | 6,457<br>(20.2%)               | 1,775<br>(20.9%)          | 1,303<br>(19.6%)        | 159 (18.3%)            | 704 (18.8%)          |
|                               | 4 <sup>th</sup>           | 4,616<br>(20.2%)     | 1,448<br>(19.5%)             | 6,458<br>(20.2%)               | 1,764<br>(20.8%)          | 1,393<br>(20.9%)        | 178 (20.5%)            | 842 (22.4%)          |
|                               | 5 <sup>th</sup> (lowest)  | 4,923<br>(21.6%)     | 1,397<br>(18.8%)             | 6,307<br>(19.7%)               | 2,068<br>(24.4%)          | 1,460<br>(21.9%)        | 192 (22.1%)            | 951 (25.3%)          |
|                               | Missing                   | 78 (0.3%)            | 27 (0.4%)                    | 110 (0.3%)                     | 71 (0.8%)                 | 20 (0.3%)               | 0 (0.0%)               | 11 (0.3%)            |
| Preoperative frailty          | Yes                       | 1,715 (7.5%)         | 527 (7.1%)                   | 2,905<br>(9.1%)                | 475 (5.6%)                | 412 (6.2%)              | 80 (9.2%)              | 329 (8.8%)           |
|                               | No                        | 21,096<br>(92.5%)    | 6,902<br>(92.9%)             | 29,131<br>(90.9%)              | 8,008<br>(94.4%)          | 6,246<br>(93.8%)        | 787 (90.8%)            | 3,424<br>(91.2%)     |

|                                        |           |                |               |                |               |               |             |               |
|----------------------------------------|-----------|----------------|---------------|----------------|---------------|---------------|-------------|---------------|
| <b>Intensity of surgical procedure</b> | High      | 66 (0.3%)      | 7,266 (97.8%) | 185 (0.6%)     | 8,298 (97.8%) | 508 (7.6%)    | 734 (84.7%) | 89 (2.4%)     |
|                                        | Low       | 22,745 (99.7%) | 163 (2.2%)    | 31,851 (99.4%) | 185 (2.2%)    | 6,150 (92.4%) | 133 (15.3%) | 3,664 (97.6%) |
| <b>Diagnosis year</b>                  | 2007-2011 | 9,504 (41.7%)  | 3,098 (41.7%) | 15,193 (47.4%) | 3,851 (45.4%) | 2,789 (41.9%) | 366 (42.2%) | 1,543 (41.1%) |
|                                        | 2012-2017 | 13,307 (58.3%) | 4,331 (58.3%) | 16,843 (52.6%) | 4,632 (54.6%) | 3,869 (58.1%) | 501 (57.8%) | 2,210 (58.9%) |
| <b>Perioperative therapy</b>           | Yes       | 12,965 (56.8%) | 1,837 (24.7%) | 25,128 (78.4%) | 7,558 (89.1%) | 3,392 (50.9%) | 553 (63.8%) | 331 (8.8%)    |
|                                        | No        | 9,846 (43.2%)  | 5,592 (75.3%) | 6,908 (21.6%)  | 925 (10.9%)   | 3,266 (49.1%) | 314 (36.2%) | 3,422 (91.2%) |

Abbreviations: ADG, aggregated diagnosis groups | IQR, interquartile range | n, number  
 Values are n (%) representing column percentages, unless otherwise indicated.



**eTable 6. Cumulative Incidence at 1-year, 3-year, and 5-year Timepoints**

| Group                             | Cancer Death                  |                       |                       | Non-cancer Death              |                       |                       | All-cause Death               |                       |                       |
|-----------------------------------|-------------------------------|-----------------------|-----------------------|-------------------------------|-----------------------|-----------------------|-------------------------------|-----------------------|-----------------------|
|                                   | Cumulative incidence (95% CI) |                       |                       | Cumulative incidence (95% CI) |                       |                       | Cumulative incidence (95% CI) |                       |                       |
|                                   | 1-year                        | 3-year                | 5-year                | 1-year                        | 3-year                | 5-year                | 1-year                        | 3-year                | 5-year                |
| <b>All patients</b><br>(n=82,037) | 8.4%<br>(8.2-8.6%)            | 16.4%<br>(16.2-16.7%) | 20.7%<br>(20.4-21.0%) | 5.3%<br>(5.1-5.5%)            | 11.9%<br>(11.6-12.2%) | 18.1%<br>(17.8-18.5%) | 11.8%<br>(11.6-12.0%)         | 26.1%<br>(25.8-26.4%) | 36.6%<br>(36.3-37.0%) |
| <b>Cancer Type</b>                |                               |                       |                       |                               |                       |                       |                               |                       |                       |
| Breast<br>(n=22,811)              | 1.8%<br>(1.6-1.9%)            | 5.8%<br>(5.5-6.1%)    | 9.1%<br>(8.6-9.5%)    | 1.9%<br>(1.8-2.1%)            | 7.0%<br>(6.7-7.4%)    | 13.4%<br>(12.9-13.9%) | 3.3%<br>(3.1-3.6%)            | 12.3%<br>(11.9-12.8%) | 22.0%<br>(21.4-22.6%) |
| Broncho-pulmonary<br>(n=7429)     | 12.0%<br>(11.3-12.7%)         | 24.0%<br>(23.0-25.0%) | 30.0%<br>(28.9-31.1%) | 5.1%<br>(4.6-5.6%)            | 12.7%<br>(12.0-13.5%) | 19.9%<br>(18.9-20.9%) | 16.1%<br>(15.3-16.9%)         | 35.8%<br>(34.7-36.9%) | 49.1%<br>(47.8-50.3%) |
| Gastro-intestinal<br>(n=32,036)   | 12.5%<br>(12.2-12.9%)         | 22.6%<br>(22.1-23.0%) | 27.3%<br>(26.8-27.9%) | 5.7%<br>(5.5-6.0%)            | 12.5%<br>(12.1-12.9%) | 18.8%<br>(18.3-19.2%) | 17.3%<br>(16.9-17.7%)         | 34.5%<br>(34.0-35.0%) | 45.6%<br>(45.0-46.2%) |
| Genito-urinary<br>(n=8483)        | 8.5%<br>(7.9-9.1%)            | 14.3%<br>(13.5-15.0%) | 17.2%<br>(16.4-18.1%) | 3.9%<br>(3.5-4.4%)            | 8.4%<br>(7.8-9.0%)    | 13.7%<br>(12.9-14.5%) | 11.7%<br>(11.0-12.4%)         | 22.3%<br>(21.4-23.2%) | 30.4%<br>(29.4-31.5%) |
| Gynecologic<br>(n=6658)           | 8.6%<br>(7.9-9.3%)            | 18.3%<br>(17.3-19.2%) | 23.3%<br>(22.2-24.4%) | 3.5%<br>(3.0-3.9%)            | 9.3%<br>(8.6-10.0%)   | 13.9%<br>(13.0-14.9%) | 11.2%<br>(10.5-12.0%)         | 26.9%<br>(25.8-28.0%) | 36.7%<br>(35.4-38.0%) |
| Oro-pharyngeal<br>(867)           | 13.5%<br>(11.3-15.9%)         | 25.7%<br>(22.8-28.7%) | 29.1%<br>(25.9-32.3%) | 6.5%<br>(5.0-8.2%)            | 13.9%<br>(11.7-16.4%) | 22.9%<br>(19.9-26.0%) | 18.0%<br>(15.6-20.7%)         | 39.0%<br>(35.7-42.4%) | 50.8%<br>(47.2-54.4%) |
| Melanoma<br>(n=3758)              | 5.2%<br>(4.5-6.0%)            | 12.9%<br>(11.9-14.1%) | 17.5%<br>(16.2-18.8%) | 3.5%<br>(2.9-4.1%)            | 11.1%<br>(10.1-12.1%) | 18.1%<br>(16.8-19.5%) | 8.0%<br>(7.1-8.9%)            | 23.5%<br>(22.1-24.9%) | 34.9%<br>(33.2-36.7%) |
| <b>Age Group</b>                  |                               |                       |                       |                               |                       |                       |                               |                       |                       |
| Age 70-74<br>(n=31,110)           | 5.8%<br>(5.5-6.1%)            | 12.4%<br>(12.0-12.8%) | 16.4%<br>(15.9-16.8%) | 2.6%<br>(2.4-2.8%)            | 6.6%<br>(6.3-6.9%)    | 10.4%<br>(10.0-10.8%) | 7.9%<br>(7.6-8.2%)            | 18.5%<br>(18.0-18.9%) | 26.4%<br>(25.8-26.9%) |
| Age 75-79<br>(n=23,439)           | 8.4%<br>(8.0-8.7%)            | 17.0%<br>(16.5-17.5%) | 21.4%<br>(20.8-22.0%) | 3.7%<br>(3.5-4.0%)            | 9.3%<br>(8.9-9.7%)    | 14.7%<br>(14.2-15.2%) | 11.3%<br>(10.9-11.8%)         | 25.8%<br>(25.2-26.4%) | 35.6%<br>(35.0-36.3%) |
| Age 80-85<br>(n=16,708)           | 10.4%<br>(10.0-10.9%)         | 19.5%<br>(18.9-20.1%) | 24.1%<br>(23.4-24.8%) | 5.1%<br>(4.8-5.5%)            | 12.6%<br>(12.1-13.1%) | 20.4%<br>(19.8-21.1%) | 14.6%<br>(14.1-15.2%)         | 31.4%<br>(30.7-32.1%) | 43.8%<br>(43.0-44.7%) |

|                              |                       |                       |                       |                     |                       |                       |                       |                       |                       |
|------------------------------|-----------------------|-----------------------|-----------------------|---------------------|-----------------------|-----------------------|-----------------------|-----------------------|-----------------------|
| Age 85 or more<br>(n=10,780) | 13.0%<br>(12.4-13.7%) | 22.0%<br>(21.2-22.8%) | 26.4%<br>(25.5-27.3%) | 8.1%<br>(7.6-8.6%)  | 19.5%<br>(18.7-20.3%) | 31.5%<br>(30.5-32.5%) | 19.8%<br>(19.1-20.6%) | 40.6%<br>(39.7-41.6%) | 57.0%<br>(56.0-58.1%) |
| <b>Frailty Status</b>        |                       |                       |                       |                     |                       |                       |                       |                       |                       |
| Frailty<br>(n=6,443)         | 13.3%<br>(12.5-14.1%) | 21.6%<br>(20.5-22.6%) | 25.6%<br>(24.5-26.8%) | 9.3%<br>(8.6-10.0%) | 20.8%<br>(19.7-21.8%) | 31.7%<br>(30.4-32.9%) | 21.4%<br>(20.4-22.4%) | 41.5%<br>(40.3-42.8%) | 56.6%<br>(55.2-58.0%) |
| No Frailty<br>(n=75,594)     | 8.0%<br>(7.8-8.2%)    | 16.0%<br>(15.7-16.3%) | 20.3%<br>(20.0-20.6%) | 3.7%<br>(3.6-3.9%)  | 9.4%<br>(9.2-9.6%)    | 15.2%<br>(14.9-15.5%) | 11.0%<br>(10.8-11.2%) | 24.8%<br>(24.5-25.1%) | 34.9%<br>(34.6-35.3%) |

Abbreviations: CI, confidence interval

**eFigure 1. Cohort Selection Flowchart**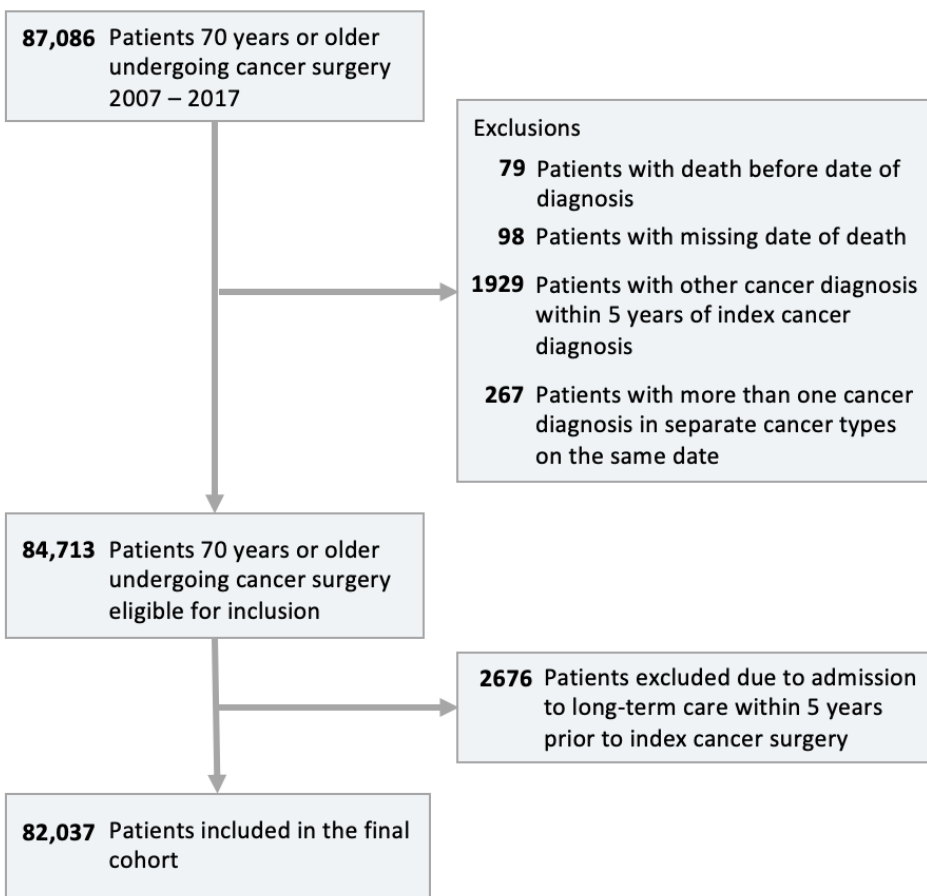

**eFigure 2. Cumulative Incidence of Cancer, Non-Cancer, and All-Cause Death by Cancer Type**

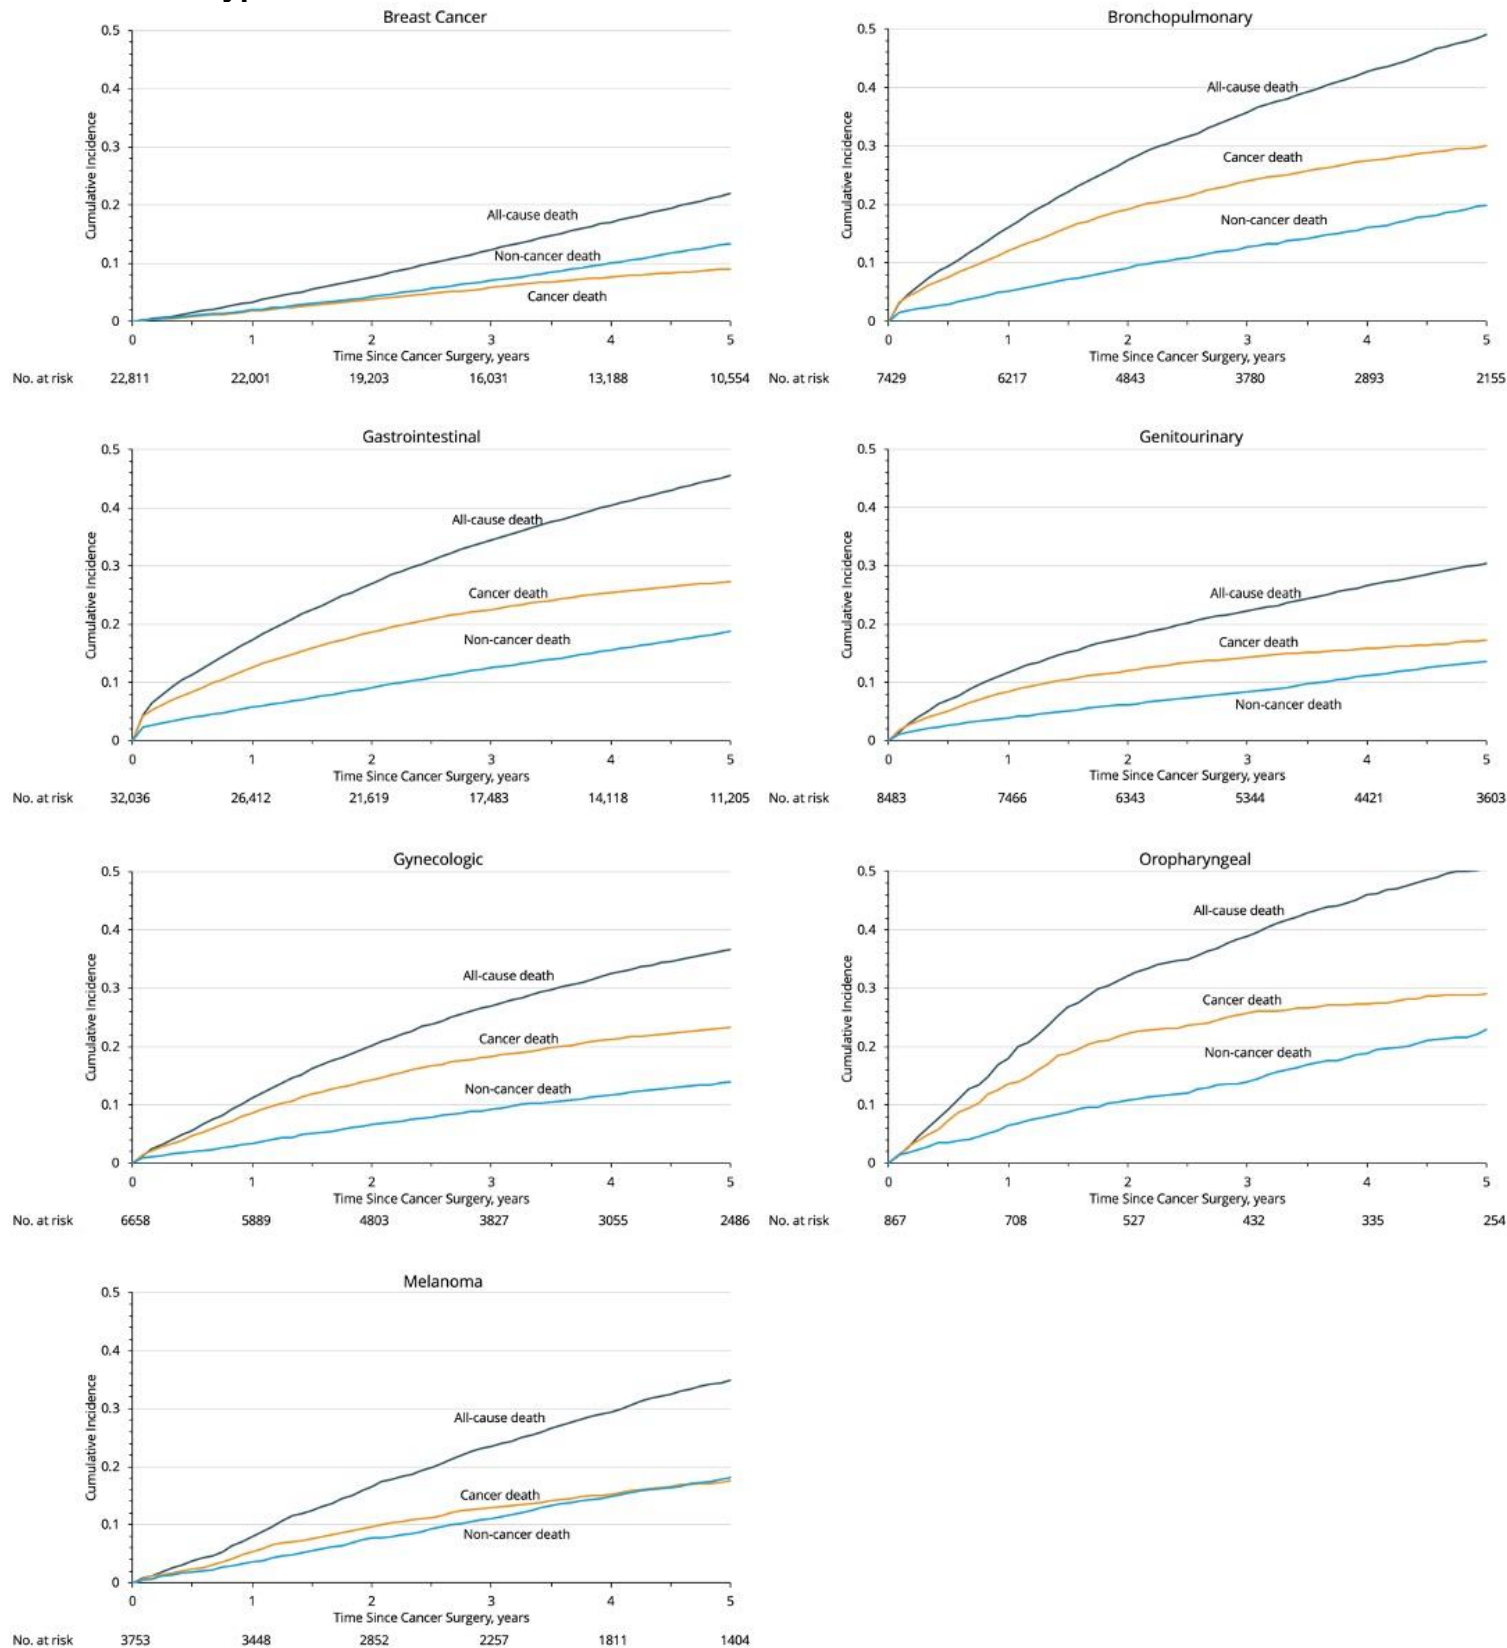

**eFigure 3. Cumulative Incidence of Cancer, Non-Cancer, and All-Cause Death Stratified by Gastrointestinal Cancer Subtypes**

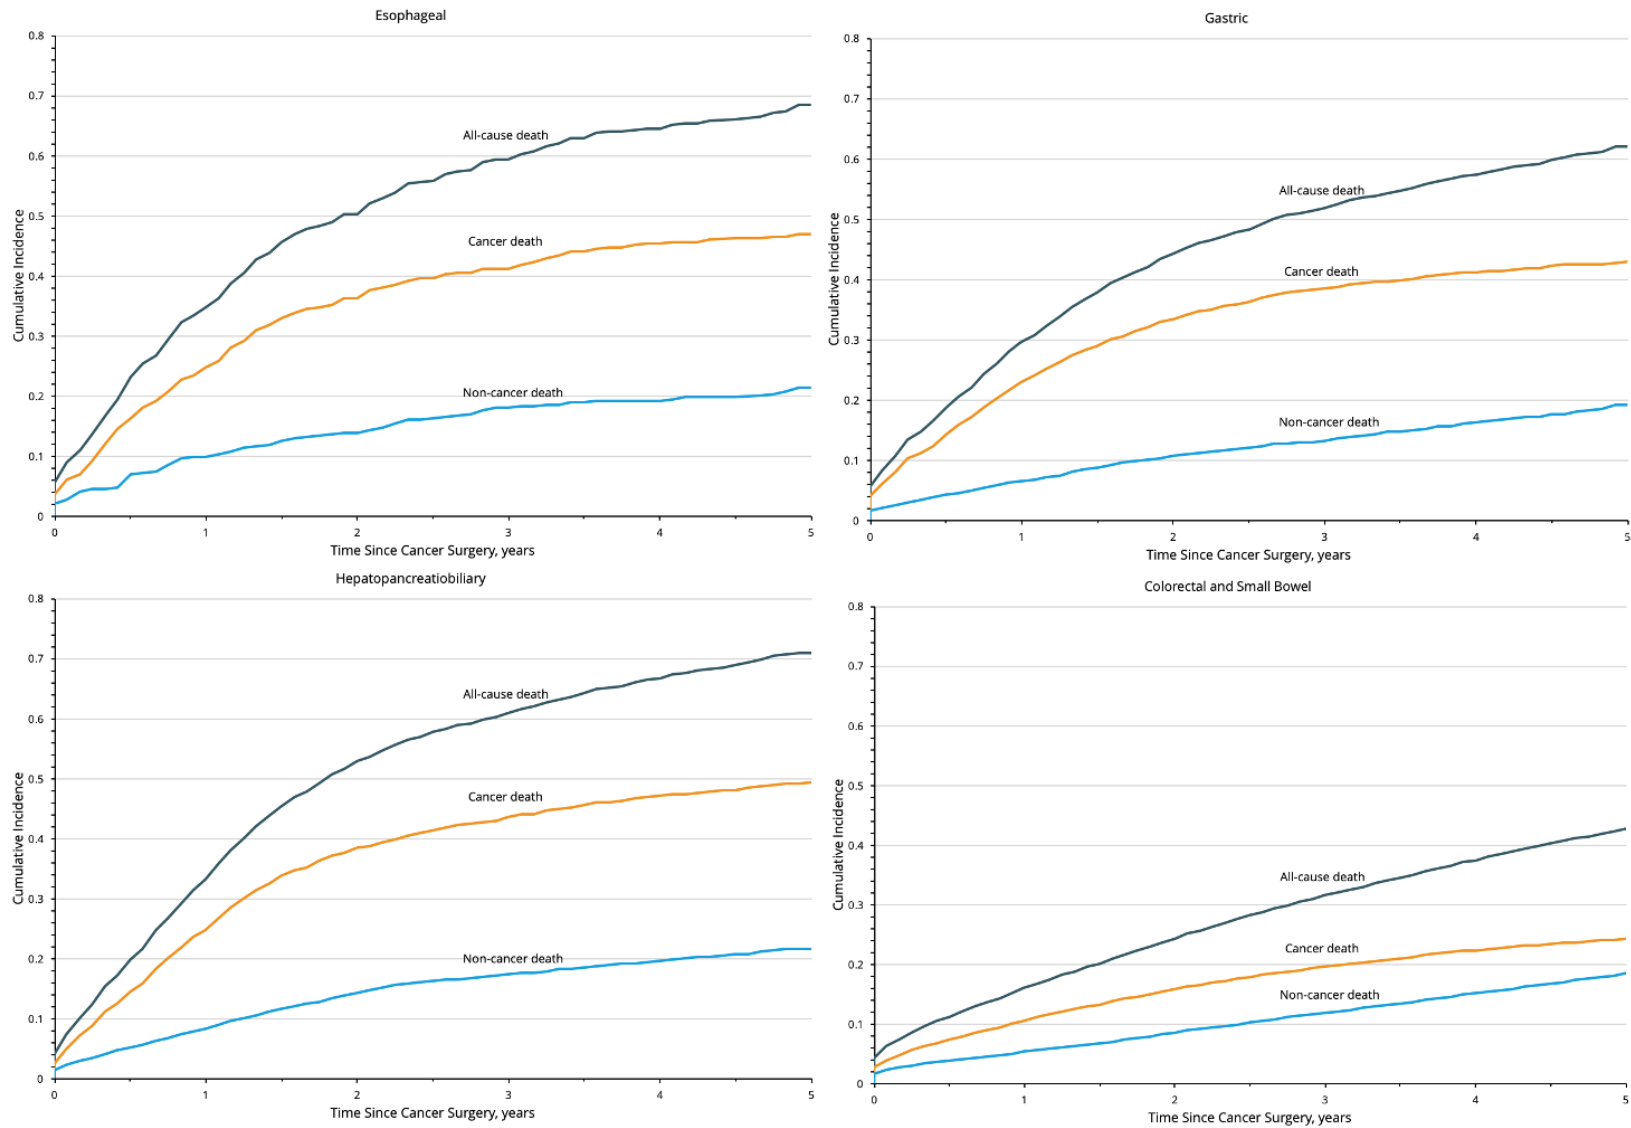

**eFigure 4. Cumulative Incidence of Cancer, Non-Cancer, and All-Cause Death Stratified by Genitourinary Cancer Subtypes**

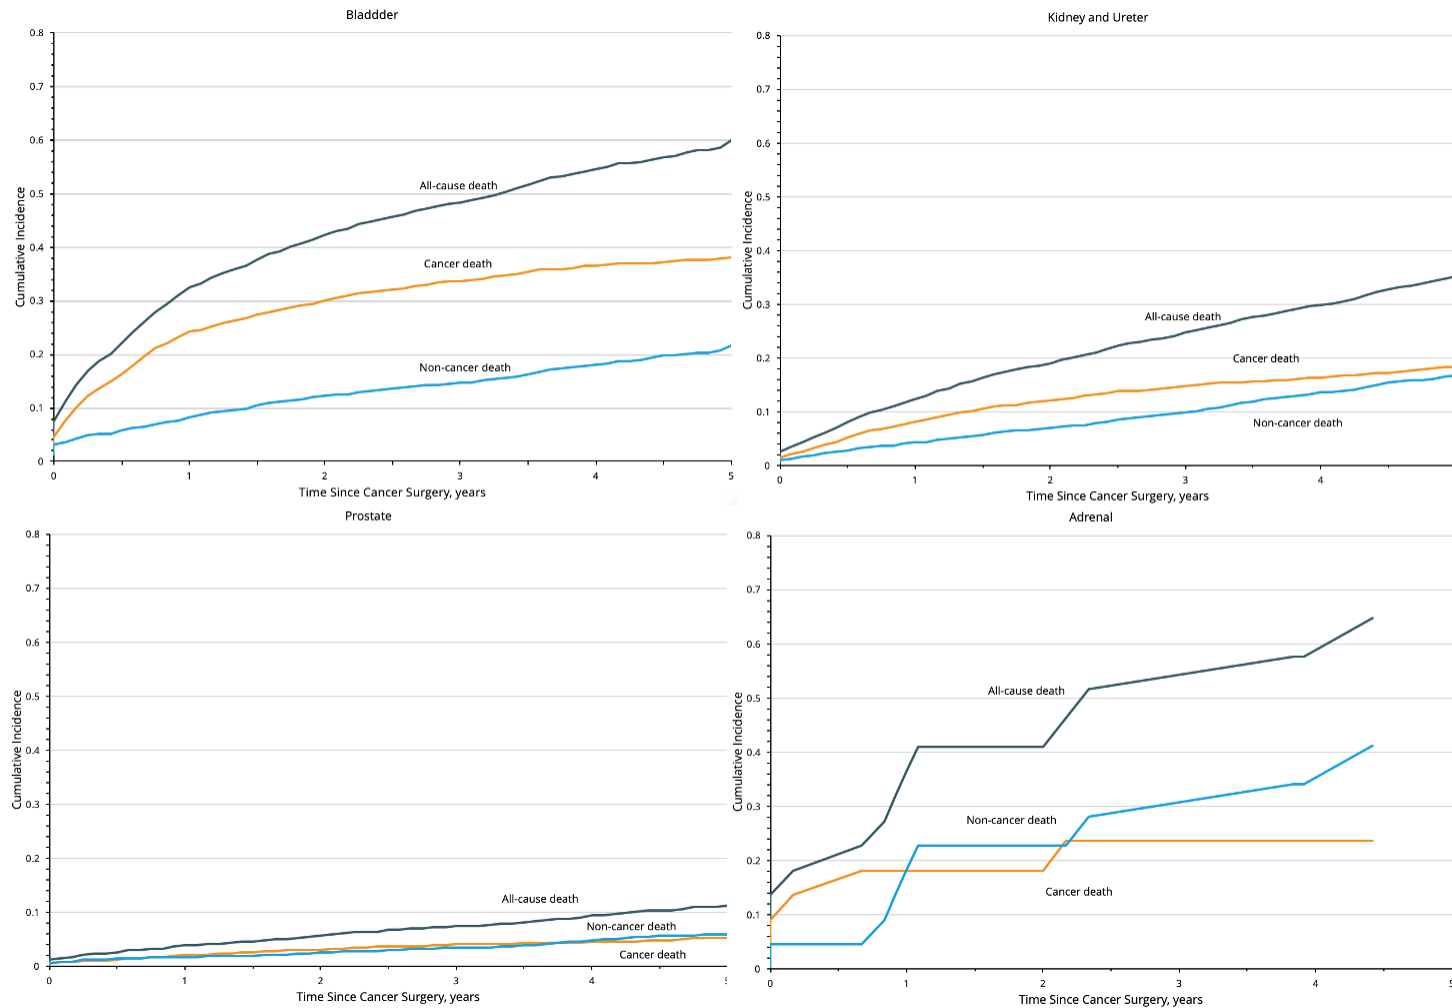

Supplement: jamasurg-e211425-s001.pdf [file jamasurg-e211425-s001.pdf]
