# Supplementary material
Source: PubMed Central journal article supplement (PMC8117065)
Supplement: jamasurg-e211425-s002.pdf [file jamasurg-e211425-s002.pdf]

\*Indicates required information. Only first name, last name, and suffix will appear in PubMed.

| <b>Group Name(s):* Recovery After Surgical Therapy for Older Adults Research–Cancer (RESTORE-Cancer) Group</b> |             |                       |                  |                                    |                                          |                                                         |                                                                                            |
|----------------------------------------------------------------------------------------------------------------|-------------|-----------------------|------------------|------------------------------------|------------------------------------------|---------------------------------------------------------|--------------------------------------------------------------------------------------------|
| First Name and Middle Initial(s)*                                                                              | Last Name*  | Suffix (eg, Jr, III)* | Academic Degrees | Institution                        | Location (city, state/province, country) | Role or Contribution, eg, chair, principal investigator | Group (if more than 1 Group listed in the byline) and/or Subgroup (eg, Steering Committee) |
| Ines                                                                                                           | Menjak      |                       | MD, MSc          | Sunnybrook Health Sciences Centre  | Toronto, Ontario, Canada                 | Design and interpretation                               |                                                                                            |
| Douglas                                                                                                        | Manuel      |                       | MD, MSc          | Ottawa Hospital Research Institute | Toronto, Ontario, Canada                 | Design and interpretation                               |                                                                                            |
| Dov                                                                                                            | Gandell     |                       | MD, MSc          | Sunnybrook Health Sciences Centre  | Toronto, Ontario, Canada                 | Design and interpretation                               |                                                                                            |
| Lesley                                                                                                         | Gotlib-Conn |                       | PhD              | Sunnybrook Research Institute      | Toronto, Ontario, Canada                 | Design and interpretation                               |                                                                                            |
| Grace                                                                                                          | Paladino    |                       |                  | NA                                 | Toronto, Ontario, Canada                 | Patient and family advisor                              |                                                                                            |
| Pietro                                                                                                         | Galluzzo    |                       |                  | NA                                 | Toronto, Ontario, Canada                 | Patient and family advisor                              |                                                                                            |
